# Supplementary material
Source: publisher figshare collection journal article supplement (https://tandf.figshare.com/articles/dataset/_/28049876)
Supplement: Supplementary file 1 [file 1]

Supplementary Table 3 The hypermethylated and differentially expressed genes in the PI3K pathway

| AccID | log2FC | Pvalue | FDR | Style | GO-1 | GO-2 | GO-3 | NS-1 | NS-2 | NS-3 |
| --- | --- | --- | --- | --- | --- | --- | --- | --- | --- | --- |
| IL3 | 1.332840299 | 1.32767E-76 | 6.57194E-74 | up | 1223 | 1211 | 1251 | 413 | 489 | 491 |
| COL6A2 | -1.099966127 | 1.75239E-43 | 2.97406E-41 | down | 412 | 376 | 457 | 834 | 889 | 816 |
| FGF11 | -1.03286591 | 3.41492E-15 | 1.20265E-13 | down | 143 | 150 | 130 | 278 | 269 | 277 |
| PRKCZ | -1.110747436 | 1.68101E-07 | 2.3831E-06 | down | 56 | 50 | 47 | 103 | 116 | 96 |
| GNG4 | -1.246704043 | 4.04123E-15 | 1.41205E-13 | down | 104 | 78 | 94 | 192 | 215 | 217 |
| COL5A1 | -2.06732388 | 0.001860113 | 0.010062909 | down | 4 | 5 | 2 | 12 | 15 | 17 |
| PDGFB | 1.726936328 | 4.67419E-05 | 0.000401804 | up | 39 | 31 | 34 | 6 | 13 | 11 |
| THBS1 | 1.412701794 | 6.27645E-07 | 8.0234E-06 | up | 68 | 88 | 73 | 16 | 35 | 31 |
| FN1 | 1.222678512 | 3.1439E-21 | 1.76177E-19 | up | 379 | 359 | 410 | 177 | 170 | 121 |
